# Supplementary material for: Efficient Adsorption on Benzoyl and Stearoyl Cellulose to Remove Phenanthrene and Pyrene from Aqueous Solution
Source: PubMed Central journal article supplement (PMC6403814; doi:10.3390/polym10091042), 2018-09-19
Supplement: polymers-10-01042-s001.pdf [file polymers-10-01042-s001.pdf]

Supplementary information

# Efficient Adsorption on Benzoyl and Stearoyl Cellulose to Remove Phenanthrene and Pyrene from Aqueous Solution

Yohan Kim <sup>1,†</sup>, Daham Jeong <sup>1,†</sup>, Kyeong Hui Park <sup>1</sup>, Jae-Hyuk Yu <sup>2</sup> and Seunho Jung <sup>1,\*</sup>

<sup>1</sup> Department of Systems Biotechnology, Microbial Carbohydrate Resource Bank (MCRB), Center for Biotechnology Research in UBITA (CBRU), Konkuk University, Seoul 05029, Korea; shsks1@hanmail.net (Y.K); amir@konkuk.ac.kr (D.J); kyeonghee17@naver.com (K.H.P)

<sup>2</sup> Departments of Bacteriology and Genetics, University of Wisconsin-Madison, Madison, WI 53706, USA; jyu@wisc.edu

\* Correspondence: shjung@konkuk.ac.kr; Tel.: +82-2-450-3520

† These authors contributed equally to this work.

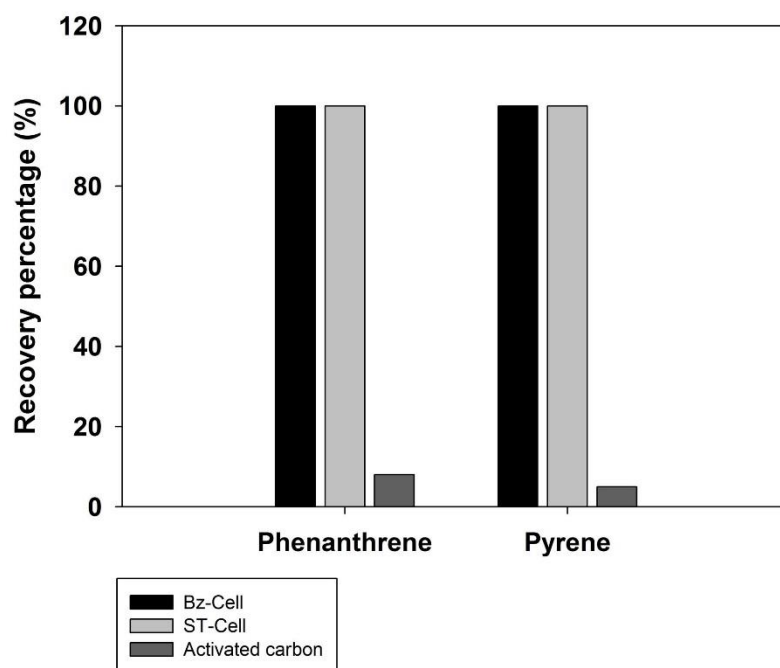

**Figure S1.** Recovery percentage (%) of PAHs from Bz-Cell, St-Cell, and activated carbon by MeOH.

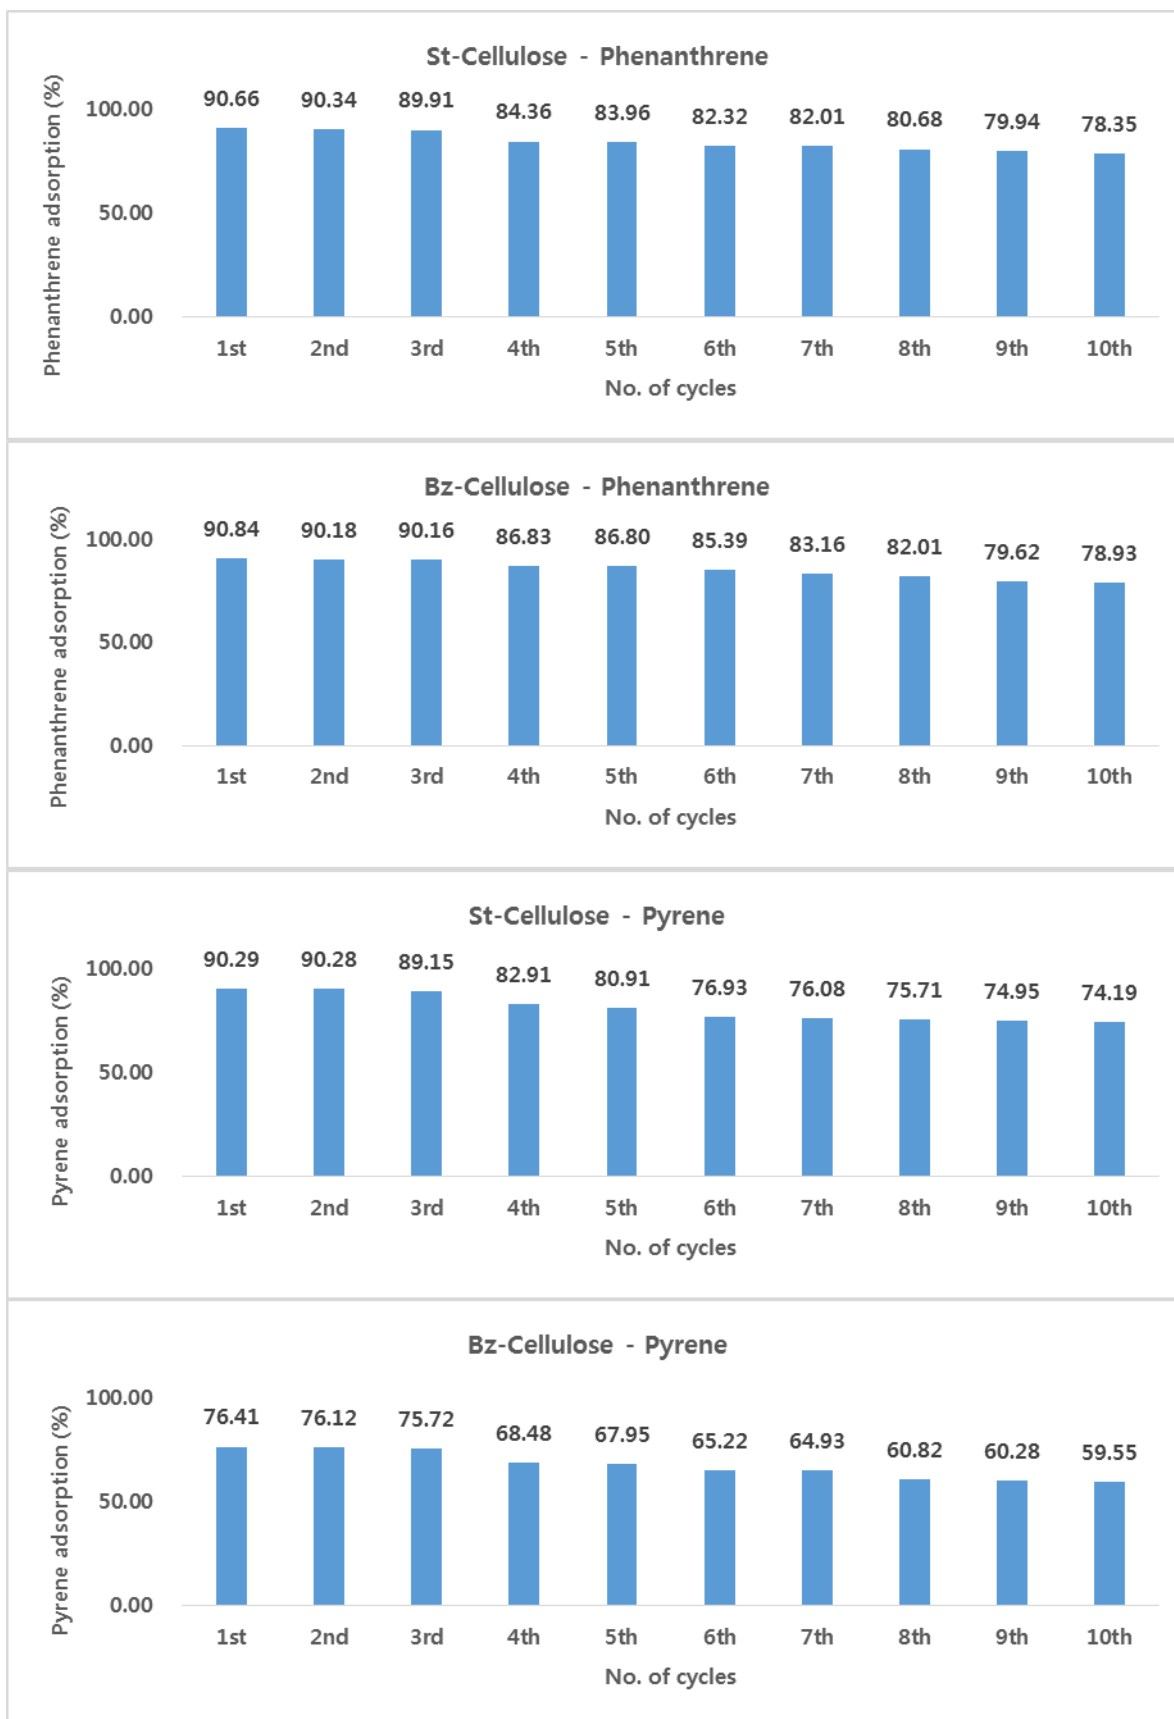

Figure S2. Recycling of Bz-Cell and St-Cell for the removal of phenanthrene and pyrene up to 10th cycles.

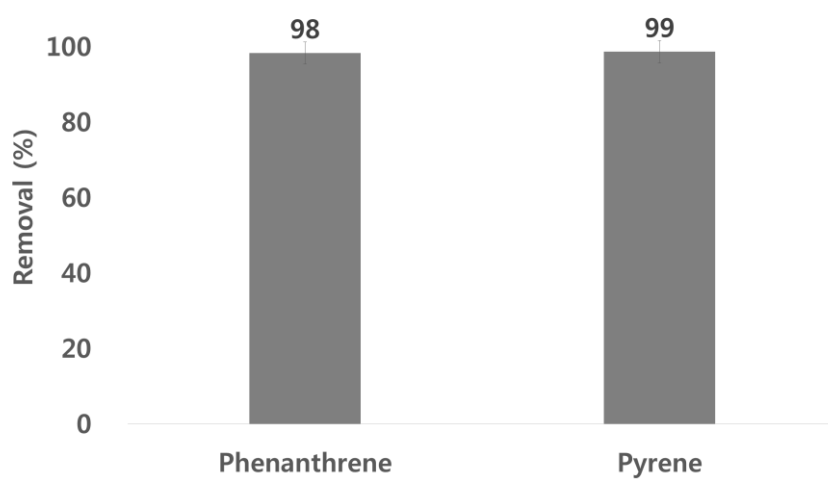

**Figure S3.** Removal efficiency (%) of phenanthrene and pyrene by activated carbon.
